# Supplementary material for: Respiratory syncytial virus, human metapneumovirus, and influenza virus infection in Bangkok, 2016-2017
Source: PeerJ. 2019 Apr 11;7:e6748. doi: 10.7717/peerj.6748 (PMC6462397; doi:10.7717/peerj.6748)
Supplement: Dataset S7 [file peerj-07-6748-s010.xlsx]

## Sheet: RSV
Year	Month	Total	RSV	RSV A	RSV B
2016	Jan	278	9	4	1
	Feb	336	9	0	0
	Mar	288	8	1	0
	Apr	206	5	1	0
	May	125	3	1	1
	Jun	127	5	3	1
	Jul	363	100	29	29
	Aug	555	206	52	63
	Sep	678	125	28	28
	Oct	486	74	14	16
	Nov	445	32	6	11
	Dec	291	14	0	3
2017	Jan	250	6	0	2
	Feb	272	7	0	0
	Mar	199	2	0	2
	Apr	161	1	0	0
	May	153	0	0	0
	Jun	310	2	0	1
	Jul	552	47	4	20
	Aug	732	123	11	55
	Sep	784	136	12	44
	Oct	561	61	6	37
	Nov	384	24	4	10
	Dec	306	12	1	0

## Sheet: hMPV
Year	Month	Total	HMPV	HMPV A	HMPV B
2016	Jan	278	1	0	0
	Feb	336	1	0	0
	Mar	288	0	0	0
	Apr	206	0	0	0
	May	125	0	0	0
	Jun	127	2	0	1
	Jul	363	6	0	2
	Aug	555	20	4	12
	Sep	678	24	0	10
	Oct	486	28	0	9
	Nov	445	18	1	8
	Dec	291	14	1	0
2017	Jan	250	6	0	0
	Feb	272	11	0	0
	Mar	199	9	1	2
	Apr	161	1	0	1
	May	153	1	1	0
	Jun	310	4	1	0
	Jul	552	35	4	6
	Aug	732	43	5	21
	Sep	784	49	5	17
	Oct	561	27	0	11
	Nov	384	11	3	5
	Dec	306	7	0	1

## Sheet: Influenza
Year	Month	Total	Influenza	Influenza A	A/H3N2	A/H1N1	Influenza B
2016	Jan	278	24	16	8	8	8
	Feb	336	51	21	1	20	30
	Mar	288	59	28	14	14	31
	Apr	206	27	15	0	15	12
	May	125	6	4	1	3	2
	Jun	127	11	6	5	1	5
	Jul	363	49	38	27	11	11
	Aug	555	130	111	71	40	19
	Sep	678	234	200	138	62	34
	Oct	486	122	110	90	20	12
	Nov	445	85	65	54	11	20
	Dec	291	16	14	11	3	2
2017	Jan	250	31	26	26	0	5
	Feb	272	11	6	5	1	5
	Mar	199	6	6	2	4	0
	Apr	161	7	6	3	3	1
	May	153	0	0	0	0	0
	Jun	310	28	20	8	12	8
	Jul	552	81	61	32	29	20
	Aug	732	185	140	93	47	45
	Sep	784	155	115	92	23	40
	Oct	561	132	100	81	19	32
	Nov	384	60	42	39	3	18
	Dec	306	18	14	14	0	4
